# Supplementary material for: Gomisin M2 Ameliorates Atopic Dermatitis-like Skin Lesions via Inhibition of STAT1 and NF-κB Activation in 2,4-Dinitrochlorobenzene/Dermatophagoides farinae Extract-Induced BALB/c Mice
Source: MDPI journal article supplement (doi:10.3390/molecules26154409), 2021-07-21
Supplement: s1 [file s1]

**Gomisin M2 ameliorates atopic dermatitis-like skin lesions via inhibition of STAT1 and NF- $\kappa$ B activation in 2, 4-dinitrochlorobenzene/*Dermatophagoides farinae* extract-induced BALB/c mice**

Jinjoo Kang<sup>a,1</sup>, Soyoung Lee<sup>b,1</sup>, Namkyung Kim<sup>a</sup>, Hima Dhakal<sup>a</sup>, Taeg Kyu Kwon<sup>c</sup>, Eun-Nam Kim<sup>d</sup>, Gil-Saeng Jeong<sup>d,\*</sup>, Sang-Hyun Kim<sup>a,\*\*</sup>

<sup>a</sup> *Department of Pharmacology, School of Medicine, Kyungpook National University, Daegu, Republic of Korea*

<sup>b</sup> *Immunoregulatory Materials Research Center, Korea Research Institute of Bioscience and Biotechnology, Jeongeup, Republic of Korea*

<sup>c</sup> *Department of Immunology, School of Medicine, Keimyung University, Daegu, Republic of Korea*

<sup>d</sup> *College of Pharmacy, Keimyung University, Daegu, Republic of Korea*

<sup>1</sup> Equally contributed.

\* Corresponding author. College of Pharmacy, Keimyung University, Daegu, Republic of

Korea.

\*\* Corresponding author. Department of Pharmacology, School of Medicine, Kyungpook National University, Daegu, Republic of Korea.

*E-mail addresses:* gsjeong@kmu.ac.kr (G-S Jeong), shkim72@knu.ac.kr (S-H Kim).

**Table S1.** Primer pair sequences used for qPCR, and the antibodies used for Western blot analysis.

| <b>Human</b>   |                                 |                                 |                          |
|----------------|---------------------------------|---------------------------------|--------------------------|
| <b>Gene</b>    | <b>F (5'→3')</b>                | <b>R (5'→3')</b>                | <b>Accession numbers</b> |
| CCL22          | AGG ACA GAG CAT GGA TCG CCT ACA | TAA TGG CAG GGA GGT AGG GCT CCT | NM_002990.5              |
| CXCL8          | GGT GCA GTT TTG CCA AGG AG      | TGC TTG AAG TTT CAC TGG CAT C   | NM_000584.4              |
| IL-1 $\beta$   | GCT GAT GGC CCT AAA CAG ATG AA  | TGA AGC CCT TGC TGT AGT GGT G   | NM_000576.3              |
| IL-6           | AAA GAG GCA CTG GCA GAA AA      | ATC TGA GGT GCC CAT GCT AC      | NM_000600.5              |
| GAPDH          | CGA CCA CTT TGT CAA GCT CA      | AGG GGA GAT TCA GTG TGG TG      | NM_001357943.2           |
| <b>Mouse</b>   |                                 |                                 |                          |
| <b>Gene</b>    | <b>F (5'→3')</b>                | <b>R (5'→3')</b>                | <b>Accession numbers</b> |
| TGF- $\beta$   | TGA TAC GCC TGA GTG GCT GTC T   | CAC AAG AGC AGT GAG CGC TGA A   | NM_011577.2              |
| IFN- $\gamma$  | TCA AGT GGC ATA GAT GTG GAA GAA | TGG CTC TGC AGG ATT TTC ATG     | NM_008337.4              |
| IL-1 $\beta$   | ATA ACC TGC TGG TGT GTG AC      | AGG TGC TGATGT ACC AGT TG       | NM_008361.4              |
| IL-4           | TCG GCA TTT TGA ACG AGG TC      | GAA AAG CCC GAA AGA GTC TC      | NM_021283.2              |
| IL-5           | GAA GTG TGG CGA GGA GAG AC      | GCA CAG TTT TGT GGG GTT TT      | NM_010558.1              |
| IL-6           | TCC AGT TGC CTT CTT GGG AC      | GGT CTG TTG GGA GTG GTA TC      | NM_001314054.1           |
| IL-12a         | GAT GAC ATG GTG AAG ACG GC      | AGG CAC AGG GTC ATC ATC AA      | NM_001159424.2           |
| IL-17A         | TTT AAC TCC CTT GGC GCA AAA     | CTT TCC CTC CGC ATT GAC AC      | NM_010552.3              |
| TSLP           | CTC CCC TGC ACA CAC CTT AC      | TCA GAC CAC CTC ATC ATG GC      | NM_021367.2              |
| $\beta$ -actin | ACC CTA AGG CCA ACC GTG AA      | ATG GCG TGA GGG AGA GCA TAG     | NM_007393.5              |

IL, Interleukin; CCL, Chemokine (C-C motif) ligand; IFN, Interferon; GAPDH,

Glyceraldehyde-3-phosphate dehydrogenase; CCR, C-C chemokine receptor; CXCL, C-

X-C motif chemokine; TSLP, Thymic stromal lymphopoietin.

| <b>Target protein</b>           | <b>Supplier</b>         | <b>Cat#</b> | <b>Size (kDa)</b> | <b>Host</b> | <b>Dilution</b> |
|---------------------------------|-------------------------|-------------|-------------------|-------------|-----------------|
| CD4                             | Abcam, MA, USA          | Ab25804     | 50, 54            | Mouse       | 1:1000          |
| CD44                            | Cell Signaling, MA, USA | #5640       | 81                | Mouse       | 1:1000          |
| I $\kappa$ B $\alpha$           | Cell Signaling, MA, USA | #9242       | 39                | Rabbit      | 1:1000          |
| $\beta$ -actin (C4)             | Santa cruz, Germany     | SC-47778    | 43                | Mouse       | 1:4000          |
| NF- $\kappa$ B p65              | Abcam, MA, USA          | ab16502     | 64                | Rabbit      | 1:1000          |
| Lamin B1                        | Santa cruz, Germany     | SC365962    | 67                | Mouse       | 1:2000          |
| phospho-STAT1 <sup>Tyr701</sup> | Cell Signaling, MA, USA | #9167       | 84, 91            | Rabbit      | 1:2000          |
| STAT1                           | Cell Signaling, MA, USA | #9172       | 84, 91            | Rabbit      | 1:2000          |
