# Supplementary material for: Gomisin M2 Ameliorates Atopic Dermatitis-like Skin Lesions via Inhibition of STAT1 and NF-κB Activation in 2,4-Dinitrochlorobenzene/Dermatophagoides farinae Extract-Induced BALB/c Mice
Source: MDPI journal article supplement (doi:10.3390/molecules26154409), 2021-07-21
Supplement: s1 [file s1]

**Gomisin M2 ameliorates atopic dermatitis-like skin lesions via inhibition of STAT1 and NF- $\kappa$ B activation in 2, 4-dinitrochlorobenzene/*Dermatophagoides farinae* extract-induced BALB/c mice**

Jinjoo Kang<sup>a,1</sup>, Soyoung Lee<sup>b,1</sup>, Namkyung Kim<sup>a</sup>, Hima Dhakal<sup>a</sup>, Taeg Kyu Kwon<sup>c</sup>, Eun-Nam Kim<sup>d</sup>, Gil-Saeng Jeong<sup>d,\*</sup>, Sang-Hyun Kim<sup>a,\*\*</sup>

<sup>a</sup> *Department of Pharmacology, School of Medicine, Kyungpook National University, Daegu, Republic of Korea*

<sup>b</sup> *Immunoregulatory Materials Research Center, Korea Research Institute of Bioscience and Biotechnology, Jeongeup, Republic of Korea*

<sup>c</sup> *Department of Immunology, School of Medicine, Keimyung University, Daegu, Republic of Korea*

<sup>d</sup> *College of Pharmacy, Keimyung University, Daegu, Republic of Korea*

<sup>1</sup> Equally contributed.

\* Corresponding author. College of Pharmacy, Keimyung University, Daegu, Republic of

Korea.

**\*\* Corresponding author.** Department of Pharmacology, School of Medicine, Kyungpook  
National University, Daegu, Republic of Korea.

*E-mail addresses:* gsjeong@kmu.ac.kr (G-S Jeong), shkim72@knu.ac.kr (S-H Kim).

## Supplementary materials and methods

### *Measure of body weight*

The body weight of each mouse was carefully monitored and measured using a HKC65050 (Cas, Incheon, Republic of Korea) after DNCB application during the study once weekly.

**Figure S1.** Effects of GM2 on the body weight of mice.

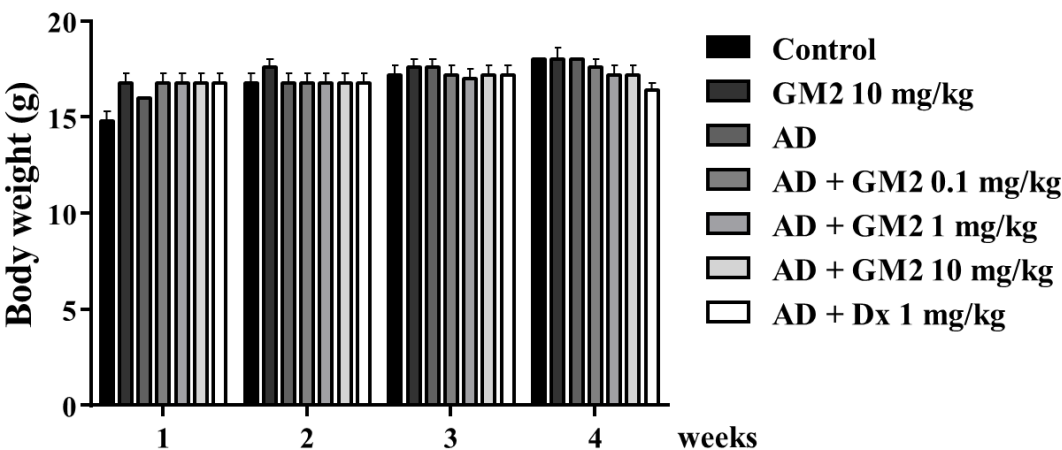

The body weights of the mice were measured on the first day of each week for 4 weeks using a HKC65050 electronic balance. Data are presented as a graph represents the means  $\pm$  SEM ( $n=5$ ). Compared with the DNCB/DFE-induced group. Dexa: dexamethasone.
